# Supplementary material
Source: Springer Nature journal article supplement (https://www.springermedizin.de/resource/supplementary/13075_2010_3038_MOESM3_ESM.pdf/9693394)

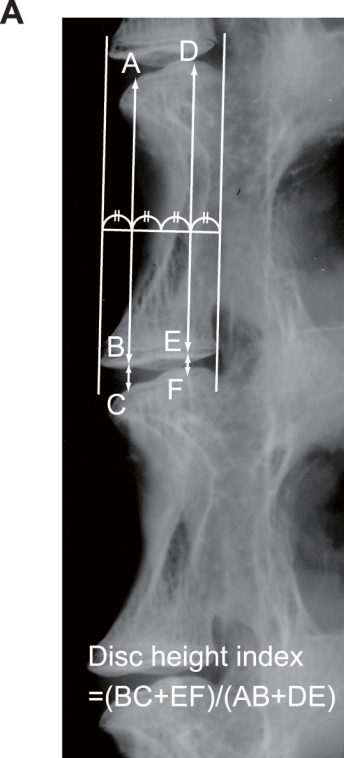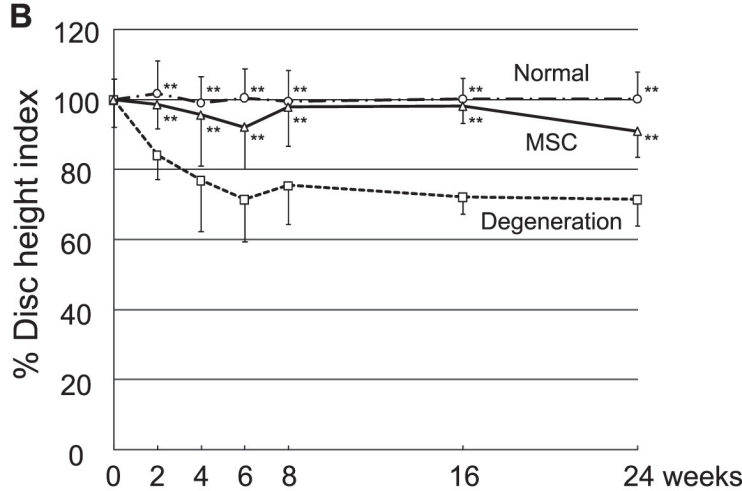

**C** ■ Bone marrow MSCs □ Synovial MSCs

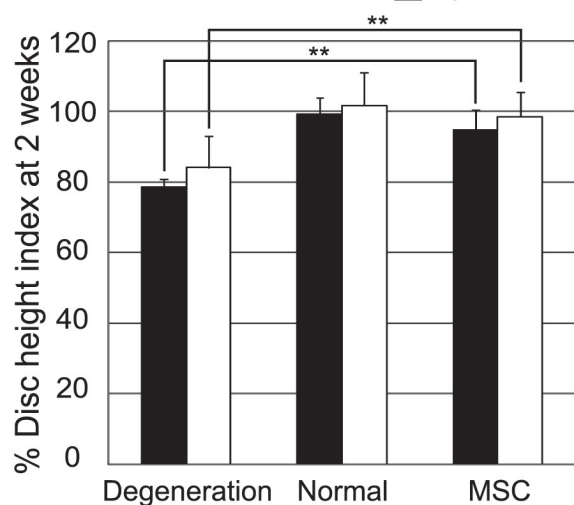

**D** T2 weighted MR images

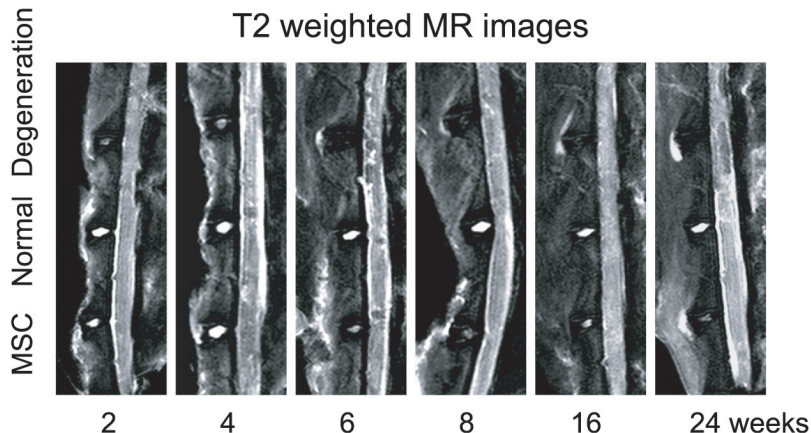

Supplement: MOESM3 [file 9693394]
